# Supplementary material for: Biochemical Properties of a Cold-Active Chitinase from Marine Trichoderma gamsii R1 and Its Application to Preparation of Chitin Oligosaccharides
Source: MDPI journal article supplement (doi:10.3390/md21060332), 2023-05-29
Supplement: s1 [file s1]

## 1. LC-MS/MS analysis of partial amino acid sequence of ChiTg

The target protein bands in the stained SDS-PAGE gels were manually excised and de-stained by acetonitrile (50%), then treated with dithiothreitol (10 mM) and iodoa-cetamide (55 mM) and finally digested overnight at 37 °C with sequencing-grade trypsin. The digested solutions were subjected to peptide sequencing analysis by LC-MS/MS with a Q Exactive Orbitrap HF mass spectrometer with a nanoelectrospray ionisation source (ThermoFisher Scientific, USA) and an LC-20AD nano high-performance liquid chromatography (HPLC) system equipped with a MonoCap C18 trap column (0.2 × 50 mm, 5 µm; Shimadzu, Japan).

The HPLC mobile phase comprised solutions A (5% acetonitrile containing 0.1% formic acid) and B (95% acetonitrile containing 0.1% formic acid). Samples were loaded by mobile phase A at a flow rate of 8 µL min<sup>-1</sup> for 4 min. The gradient elution program was as follows: 0 min, 2% B; 40 min, 35% B; 45 min, 80% B; 49 min, 80% B; 50 min, 2% B; and 60 min, 2% B at a flow rate of 300 nL • min<sup>-1</sup>.

The resulting nanoflow liquid chromatography eluate was directly subjected to nanoelectrospray ionization, followed by the mass spectrometry in the positive-ion mode. The electrospray voltage and capillary temperature were 1.6 kV and 250 °C, respectively. The MS scan was acquired within an *m/z* range of 350 to 2,000 in the Orbitrap at a resolution of 70,000. The MS/MS scans were detected in a high-energy collisional dissociation operating mode with 27.0% normalised collision energy. Identical ions that were detected more than two times within 15 s were dynamically excluded.

The collected MS/MS profiles were analysed with Proteome Discoverer software (ThermoFisher Scientific, USA) and searched for in the National Center for Biotechnology Information (NCBI) protein database using the following search parameters: fixed modifications, carbamidomethyl (C); variable modifications, oxidation (M); enzyme, trypsin; maximum missed cleavages, 2; peptide mass tolerance, 20 ppm; fragment mass tolerance, 0.6 Da; mass values, monoisotopic.

## 1. Supplement Table

**Table S1.** Effects of different metal ions on the activity of ChiTg.

| Substrate        | Relative activity (%) |
|------------------|-----------------------|
| Ca <sup>2+</sup> | 104.3                 |
| Mg <sup>2+</sup> | 97.3                  |
| Zn <sup>2+</sup> | 106.5                 |
| K <sup>+</sup>   | 89.6                  |
| Na <sup>+</sup>  | 92.3                  |
| Cu <sup>2+</sup> | 81.2                  |
| Al <sup>3+</sup> | 46.3                  |
| Mn <sup>2+</sup> | 58.4                  |

## 2. Supplement Figures

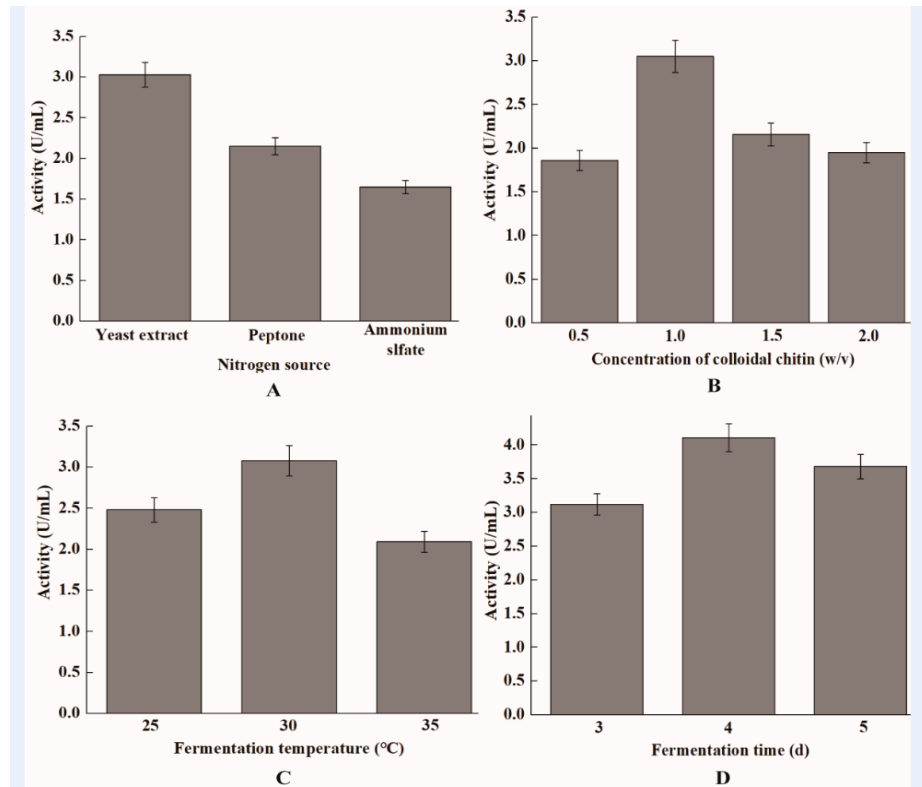

**Figure S1.** Optimization of nitrogen source (A), concentration of colloidal chitin (B), fermentation temperature (C) and fermentation time (D) for production of chitinase from *T. gamsii* R1.

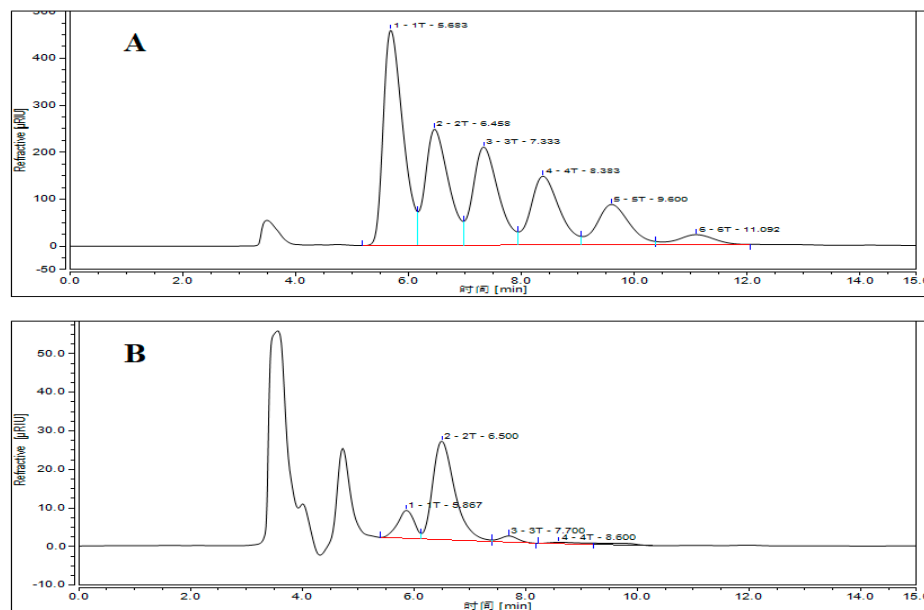

**Figure s2.** The HPLC charts of standard COSs with degree of polymerization 1 to 6 (A) and hydrolysates (B). The numbers of 1T to 6T represent GlcNAc, (GlcNAc)<sub>2</sub>, (GlcNAc)<sub>3</sub>, (GlcNAc)<sub>4</sub>, (GlcNAc)<sub>5</sub> and (GlcNAc)<sub>6</sub>, respectively.
